# Supplementary material for: Haplotype Analysis of GmSGF14 Gene Family Reveals Its Roles in Photoperiodic Flowering and Regional Adaptation of Soybean
Source: MDPI journal article supplement (doi:10.3390/ijms24119436), 2023-05-29
Supplement: s1 [file s1]

## **Supplementary Materials**

**This PDF file includes:**

Supplementary Figures S1-S2

Supplementary Tables S1-S4

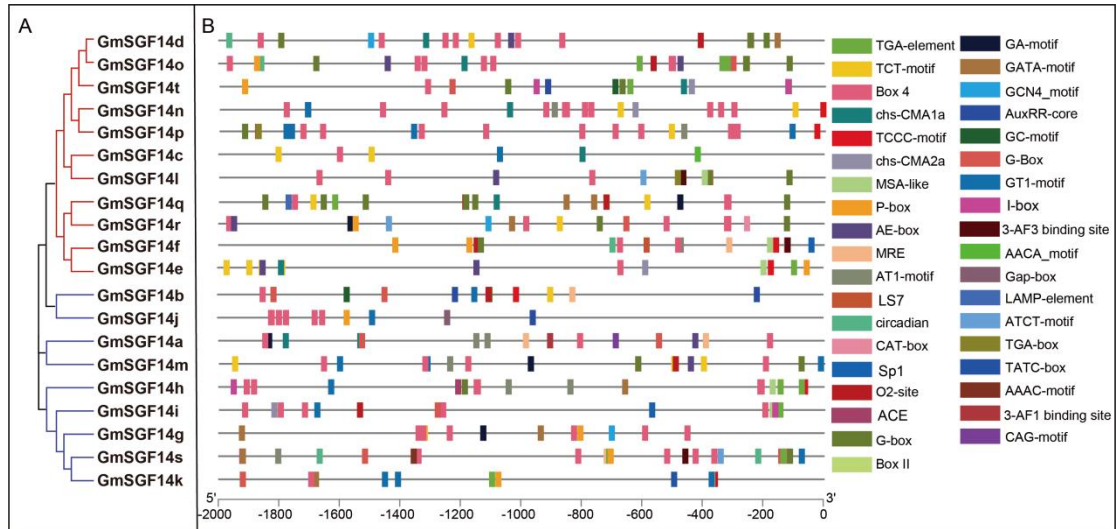

**Figure S1. Analysis of cis-acting elements within the promoters of *GmSGF14* genes.**(A) Phylogenetic tree of soybean *GmSGF14* proteins, with different subfamilies represented by different colors. (B) Type and location of cis-acting elements in the promoter region. Different cis-elements are represented by different colored boxes.

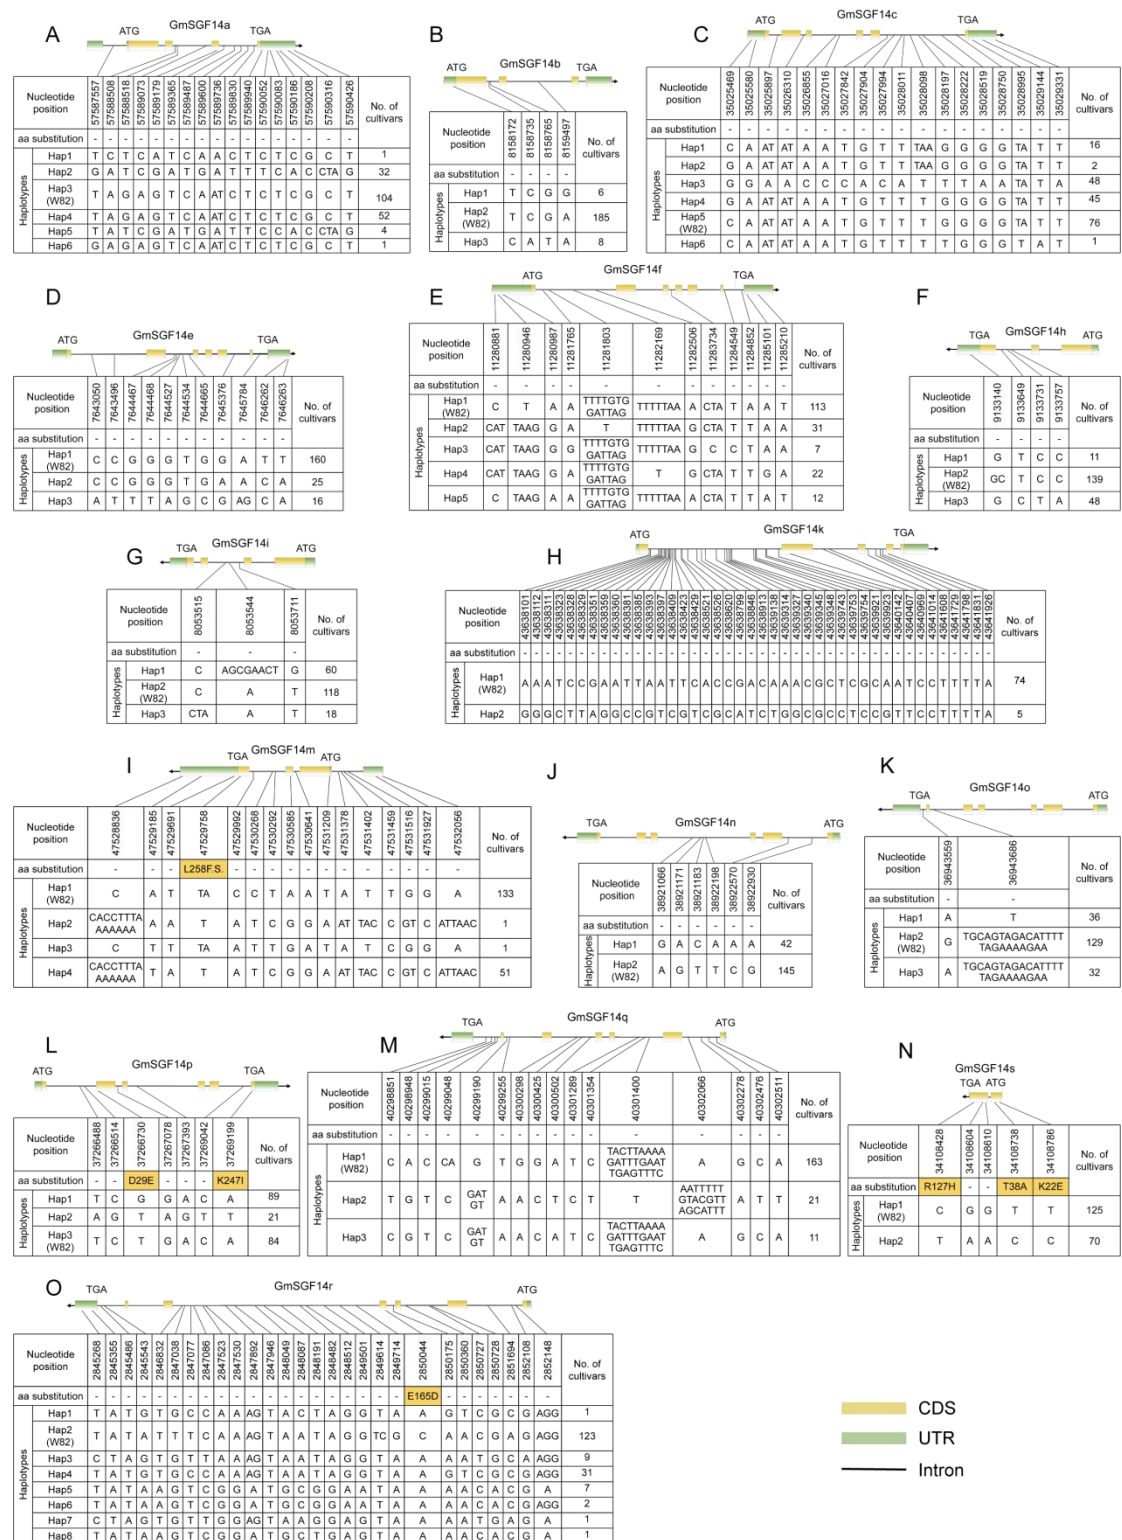

**Table S1.** Physicochemical properties of GmSGF14 proteins in soybean

| Gene name       | Gene ID                | Amino acid number / aa | Molecular weight/kD | pI   | Instability index | Aliphatic index | GRAVY  |
|-----------------|------------------------|------------------------|---------------------|------|-------------------|-----------------|--------|
| <i>GmSGF14a</i> | <i>Glyma.18G298300</i> | 258                    | 29.1                | 4.70 | 48.8              | 89.3            | -0.463 |
| <i>GmSGF14b</i> | <i>Glyma.04G092600</i> | 251                    | 28.2                | 4.81 | 42.0              | 90.2            | -0.352 |
| <i>GmSGF14c</i> | <i>Glyma.05G158100</i> | 260                    | 29.3                | 4.80 | 41.6              | 82.6            | -0.475 |
| <i>GmSGF14d</i> | <i>Glyma.13G290900</i> | 262                    | 29.5                | 4.77 | 39.2              | 82.0            | -0.570 |
| <i>GmSGF14e</i> | <i>Glyma.01G058000</i> | 260                    | 29.5                | 4.83 | 50.8              | 80.7            | -0.580 |
| <i>GmSGF14f</i> | <i>Glyma.02G115900</i> | 260                    | 29.5                | 4.83 | 51.7              | 81.4            | -0.580 |
| <i>GmSGF14g</i> | <i>Glyma.02G208700</i> | 263                    | 29.4                | 4.67 | 46.5              | 82.4            | -0.481 |
| <i>GmSGF14h</i> | <i>Glyma.04G099900</i> | 289                    | 32.4                | 4.67 | 51.3              | 90.2            | -0.311 |
| <i>GmSGF14i</i> | <i>Glyma.06G101500</i> | 280                    | 31.7                | 5.46 | 52.0              | 92.8            | -0.366 |
| <i>GmSGF14j</i> | <i>Glyma.06G094400</i> | 251                    | 28.4                | 4.81 | 41.1              | 90.5            | -0.347 |
| <i>GmSGF14k</i> | <i>Glyma.14G176900</i> | 315                    | 35.2                | 4.71 | 44.8              | 83.7            | -0.340 |
| <i>GmSGF14l</i> | <i>Glyma.08G115800</i> | 260                    | 29.2                | 4.90 | 45.0              | 78.4            | -0.553 |
| <i>GmSGF14m</i> | <i>Glyma.08G363800</i> | 261                    | 29.4                | 4.81 | 45.4              | 102             | -0.159 |
| <i>GmSGF14n</i> | <i>Glyma.12G229200</i> | 266                    | 30.5                | 4.85 | 44.8              | 79.5            | -0.598 |
| <i>GmSGF14o</i> | <i>Glyma.12G210400</i> | 262                    | 29.5                | 4.73 | 40.5              | 82.3            | -0.546 |
| <i>GmSGF14p</i> | <i>Glyma.13G270600</i> | 264                    | 30.2                | 4.84 | 46.2              | 84.9            | -0.545 |
| <i>GmSGF14q</i> | <i>Glyma.07G226000</i> | 260                    | 29.6                | 4.79 | 52.4              | 83.7            | -0.583 |
| <i>GmSGF14r</i> | <i>Glyma.20G025900</i> | 261                    | 29.6                | 4.79 | 53.8              | 81.5            | -0.612 |
| <i>GmSGF14s</i> | <i>Glyma.17G208100</i> | 160                    | 18.7                | 5.61 | 41.3              | 83.3            | -0.116 |
| <i>GmSGF14t</i> | <i>Glyma.20G043700</i> | 71                     | 7.92                | 5.70 | 32.3              | 74.0            | -0.180 |

**Table S2.** The information of cis-acting elements within promoter regions of *GmSGF14*

| <b>cis-acting element</b> | <b>Element action information</b>                                    |
|---------------------------|----------------------------------------------------------------------|
| TCT-motif                 | part of a light responsive element                                   |
| G-Box                     | cis-acting regulatory element involved in light responsiveness       |
| Box 4                     | part of a conserved DNA module involved in light responsiveness      |
| circadian                 | cis-acting regulatory element involved in circadian control          |
| chs-CMA1a                 | part of a light responsive element                                   |
| GATA-motif                | part of a light responsive element                                   |
| GCN4_motif                | cis-regulatory element involved in endosperm expression              |
| O2-site                   | cis-acting regulatory element involved in zein metabolism regulation |
| AE-box                    | part of a module for light response                                  |
| G-box                     | cis-acting regulatory element involved in light responsiveness       |
| TGA-element               | auxin-responsive element                                             |
| Box II                    | protein binding site                                                 |
| AuxRR-core                | cis-acting regulatory element involved in auxin responsiveness       |
| GC-motif                  | enhancer-like element involved in anoxic specific inducibility       |
| chs-CMA2a                 | part of a light responsive element                                   |
| I-box                     | part of a light responsive element                                   |
| TCCC-motif                | part of a light responsive element                                   |
| GT1-motif                 | light responsive element                                             |
| AT1-motif                 | part of a light responsive module                                    |
| TGA-box                   | part of an auxin-responsive element                                  |
| AACA_motif                | involved in endosperm-specific negative expression                   |
| ATCT-motif                | part of a conserved DNA module involved in light responsiveness      |
| 3-AF3 binding site        | part of a conserved DNA module array (CMA3)                          |
| MSA-like                  | cis-acting element involved in cell cycle regulation                 |
| LAMP-element              | part of a light responsive element                                   |
| GA-motif                  | part of a light responsive element                                   |
| CAT-box                   | cis-acting regulatory element related to meristem expression         |
| MRE                       | MYB binding site involved in light responsiveness                    |
| LS7                       | part of a light responsive element                                   |
| Sp1                       | light responsive element                                             |
| Gap-box                   | part of a light responsive element                                   |
| 3-AF1 binding site        | light responsive element                                             |
| CAG-motif                 | part of a light response element                                     |
| ACE                       | cis-acting element involved in light responsiveness                  |
| AAAC-motif                | light responsive element                                             |
| TATC-box                  | cis-acting element involved in gibberellin-responsiveness            |
| P-box                     | gibberellin-responsive element                                       |

**Table S3.** Source information of 207 re-sequenced soybean varieties

| Cultivar       | Region | Source         | Cultivar         | Region | Source         |
|----------------|--------|----------------|------------------|--------|----------------|
| Beihudou       | NE     | Heilongjiang   | Heinong44        | NE     | Heilongjiang   |
| Beifeng2       | NE     | Heilongjiang   | Heinong48        | NE     | Heilongjiang   |
| Beifeng9       | NE     | Heilongjiang   | Kenfeng16        | NE     | Heilongjiang   |
| Beifeng11      | NE     | Heilongjiang   | Suinong8         | NE     | Heilongjiang   |
| Beidou5        | NE     | Heilongjiang   | Suinong10        | NE     | Heilongjiang   |
| Dengke1        | NE     | Heilongjiang   | Changnong4       | NE     | Jilin          |
| Dongnong4      | NE     | Heilongjiang   | Miquanhuangdou   | NE     | Xinjiang       |
| Dongnong72-806 | NE     | Heilongjiang   | Changjihuangdou  | NE     | Xinjiang       |
| Fengshou10     | NE     | Heilongjiang   | Zhi2             | NE     | Jilin          |
| Fengshou12     | NE     | Heilongjiang   | Zihua4           | NE     | Heilongjiang   |
| Fengshou17     | NE     | Heilongjiang   | Changnong5       | NE     | Jilin          |
| Fengshou19     | NE     | Heilongjiang   | Fengdihuang      | NE     | Jilin          |
| Fengshou24     | NE     | Heilongjiang   | Huangbaozhu      | NE     | Jilin          |
| Hefeng25       | NE     | Heilongjiang   | Jilin3           | NE     | Jilin          |
| Hefeng35       | NE     | Heilongjiang   | Jilin6           | NE     | Jilin          |
| Heihe3         | NE     | Heilongjiang   | Jilin13          | NE     | Jilin          |
| Heihe9         | NE     | Heilongjiang   | Jilin20          | NE     | Jilin          |
| Heihe18        | NE     | Heilongjiang   | Jilin30          | NE     | Jilin          |
| Heihe19        | NE     | Heilongjiang   | Jilin47          | NE     | Jilin          |
| Heihe27        | NE     | Heilongjiang   | Jiti5            | NE     | Jilin          |
| Heihe38        | NE     | Heilongjiang   | Jiyu57           | NE     | Jilin          |
| Heihe51        | NE     | Heilongjiang   | Jiunong9         | NE     | Jilin          |
| Heihe54        | NE     | Heilongjiang   | Jiunong22        | NE     | Jilin          |
| Heilongjiang41 | NE     | Heilongjiang   | Xiaojinhuang1    | NE     | Jilin          |
| Huajiang4      | NE     | Heilongjiang   | Zaofeng1         | NE     | Jilin          |
| Jinyuan2       | NE     | Heilongjiang   | Jiti1            | NE     | Liaoning       |
| JianMGodou1    | NE     | Heilongjiang   | Jin6604-24       | NE     | Liaoning       |
| Jingshanpu     | NE     | Heilongjiang   | Kaiyu3           | NE     | Liaoning       |
| Kexi283        | NE     | Heilongjiang   | Kaiyu8           | NE     | Liaoning       |
| Kangxian4      | NE     | Heilongjiang   | Kaiyu10          | NE     | Liaoning       |
| Mancangjin     | NE     | Heilongjiang   | Tiefeng3         | NE     | Liaoning       |
| Suinong3       | NE     | Heilongjiang   | Tiefeng8         | NE     | Liaoning       |
| Suinong28      | NE     | Heilongjiang   | Tiefeng18        | NE     | Liaoning       |
| Suinong41      | NE     | Heilongjiang   | Tiefeng19        | NE     | Liaoning       |
| Mengdou30      | NE     | Inner Mongolia | Tiefeng20        | NE     | Liaoning       |
| Hejiao6        | NE     | Heilongjiang   | Fushou           | NE     | Inner Mongolia |
| Hejiao8        | NE     | Heilongjiang   | Jindou2          | NE     | Shanxi         |
| Hefeng22       | NE     | Heilongjiang   | Jindou3          | NE     | Shanxi         |
| Hefeng45       | NE     | Heilongjiang   | Dandou2          | NE     | Liaoning       |
| Hefeng47       | NE     | Heilongjiang   | Dandou4          | NE     | Liaoning       |
| Hefeng50       | NE     | Heilongjiang   | Jin8-14          | NE     | Liaoning       |
| Hefeng55       | NE     | Heilongjiang   | Jindou33         | NE     | Liaoning       |
| Heinong16      | NE     | Heilongjiang   | Liaodou15        | NE     | Liaoning       |
| Heinong26      | NE     | Heilongjiang   | Tiefeng31        | NE     | Liaoning       |
| Heinong33      | NE     | Heilongjiang   | Dandou1          | NE     | Liaoning       |
| Heinong35      | NE     | Heilongjiang   | Tiefeng29        | NE     | Liaoning       |
| Heinong37      | NE     | Heilongjiang   | Changpingqingdou | NE     | Beijing        |
| Heinong43      | NE     | Heilongjiang   | Clay             | USA    | USA            |

| Cultivar        | Region | Source   | Cultivar                        | Region | Source    |
|-----------------|--------|----------|---------------------------------|--------|-----------|
| McCall          | USA    | USA      | Hezeniumaohuang                 | HHH    | Shandong  |
| Merit           | USA    | USA      | Ludou4                          | HHH    | Shandong  |
| Norman          | USA    | USA      | Yanhuang1                       | HHH    | Shandong  |
| Portage         | USA    | USA      | Yidupingdinghuang               | HHH    | Shandong  |
| Wilkin          | USA    | USA      | Wenfeng5                        | HHH    | Shandong  |
| Chippewa64      | USA    | USA      | Wenfeng7                        | HHH    | Shandong  |
| Evans           | USA    | USA      | Shangcaiercaoshipingd<br>ingshi | HHH    | Henan     |
| Amsoy           | USA    | USA      | Weiqingdou                      | HHH    | Henan     |
| Amsoy71         | USA    | USA      | Zhengzhou135                    | HHH    | Henan     |
| Beeson          | USA    | USA      | Naiyinheidou                    | HHH    | Hebei     |
| Corsoy          | USA    | USA      | Haiyangpamanqing                | HHH    | Shandong  |
| Hark            | USA    | USA      | Yuejin4                         | HHH    | Shandong  |
| Harosoy63       | USA    | USA      | Yudou2                          | HHH    | Henan     |
| Wayne           | USA    | USA      | Yudou8                          | HHH    | Henan     |
| Clark           | USA    | USA      | Yudou22                         | HHH    | Henan     |
| Cutler          | USA    | USA      | Zheng92116                      | HHH    | Henan     |
| Bedford         | USA    | USA      | Xudou1                          | HHH    | Jiangsu   |
| Dare            | USA    | USA      | Xudou2                          | HHH    | Jiangsu   |
| Forrest         | USA    | USA      | Xudou5                          | HHH    | Jiangsu   |
| Centennial      | USA    | USA      | Xudou9                          | HHH    | Jiangsu   |
| Hood            | USA    | USA      | 58-161                          | HHH    | Jiangsu   |
| Tracy           | USA    | USA      | Wandou24                        | HHH    | Aahui     |
| Bragg           | USA    | USA      | Yuejin5                         | HHH    | Shandong  |
| Braxton         | USA    | USA      | Taixingheidou                   | SC     | Jiangsu   |
| Dowling         | USA    | USA      | Edou8                           | SC     | Hubei     |
| Jupiter         | USA    | USA      | Aijiaozao                       | SC     | Hubei     |
| Huairouhuangdou | HHH    | Beijing  | Tianlong1                       | SC     | Hubei     |
| Qunyingdou      | HHH    | Hebei    | Guichun1                        | SC     | Guangxi   |
| Zhonghuang30    | HHH    | Hebei    | Heibiqing                       | SC     | Guangdong |
| Zhonghuang35    | HHH    | Hebei    | Zigongqingpidou                 | SC     | Sichuan   |
| Jindou19        | HHH    | Shanxi   | Liuyuehuang                     | SC     | Guizhou   |
| Jindou21        | HHH    | Shanxi   | Qiandou6                        | SC     | Guizhou   |
| Jindou25        | HHH    | Shanxi   | Jinjiangdaqingren               | SC     | Fujian    |
| Bahong1         | HHH    | Hebei    | Taiwan75                        | SC     | Taiwan    |
| Youbian30       | HHH    | Hebei    | Guichun8                        | SC     | Guangxi   |
| Jindou23        | HHH    | Shanxi   | Baihuadou                       | SC     | Guangdong |
| Hai94           | HHH    | Shanxi   | Yulingdahuangdou                | SC     | Guangxi   |
| Jidou7          | HHH    | Hebei    | Juhuangdadou                    | SC     | Guangdong |
| Ludou11         | HHH    | Shandong | Wuhuasiyuehuang                 | SC     | Guangdong |
| Qihuang10       | HHH    | Shandong | Shangyukanshanbai               | SC     | Zhejiang  |
| Henanzaofeng1   | HHH    | Henan    | Zhechun3                        | SC     | Zhejiang  |
| Kefeng6         | HHH    | Hebei    | Chengliuniumaohuang             | SC     | Henan     |
| Handou5         | HHH    | Hebei    | Fengchengniupidou               | SC     | Jiangxi   |
| Jidou12         | HHH    | Hebei    | Yunyizao                        | SC     | Hunan     |
| Jidou17         | HHH    | Hebei    | Dian86-4                        | SC     | Yunnan    |
| Zhongdou19      | HHH    | Hebei    | Jinningdahuangdou               | SC     | Yunnan    |
| Zhonghuang13    | HHH    | Hebei    | Suidaohuang                     | SC     | Jiangsu   |
| Zhonghuang37    | HHH    | Hebei    | Edou2                           | SC     | Hubei     |
| Hedou13         | HHH    | Shandong | Houzimao                        | SC     | Hubei     |

| Cultivar        | Region | Source  | Cultivar         | Region | Source    |
|-----------------|--------|---------|------------------|--------|-----------|
| Nannong493-1    | SC     | Jiangsu | Yangchunqingdou  | SC     | Guangdong |
| Suxie1          | SC     | Jiangsu | Lanxidaqingdou   | SC     | Zhejiang  |
| Bayueqing       | SC     | Hunan   | Zigongdongdou    | SC     | Sichuan   |
| Jingda332       | SC     | Jiangsu | Shangraodaqingsi | SC     | Jiangxi   |
| Pingguohuangdou | SC     | Guangxi | Qiudou1          | SC     | Hunan     |
| Nandou12        | SC     | Sichuan |                  |        |           |

\* NE: Northeast of China; HHH: Huang-Huai-Hai; SC: South of China.

**Table S4.** Primer sequences used for qRT-PCR analysis of *GmSGF14* gene family

| Gene name       | Forward primer (5'-3') | Reverse primer (5'-3')   |
|-----------------|------------------------|--------------------------|
| <i>GmSGF14a</i> | CCGCATCTCCCGAGAGTAAA   | CCAGCCTAATGGGGTGAGTG     |
| <i>GmSGF14b</i> | CGAGTTTAAGGTTGGGGACGAA | GTTGAGAGCAAGACCCAATCT    |
| <i>GmSGF14c</i> | AAAGGGAACGATGTGAGCGT   | TCACCGGACTTGAACCTCTGC    |
| <i>GmSGF14d</i> | CGTCTACATCGCCAAACTCG   | ATCCTCCAGGACGCTCTGC      |
| <i>GmSGF14e</i> | GGCGCATCATGTCCTCAATT   | GCTGATGCGGAAGAAGGAAT     |
| <i>GmSGF14f</i> | CCTCTTGCGCATAATGTCC    | TCTGCTGATCCGGAAGAAGG     |
| <i>GmSGF14g</i> | CTATCAGGCTGGGTCTTGCT   | CATCTGCACCATCATCCTGC     |
| <i>GmSGF14h</i> | AGGTTGCCATAGCTCATCCA   | ATCCTGTTTCGGTGCTGCTT     |
| <i>GmSGF14i</i> | AACATCTGCGACGGTATCCT   | ATGAGTAGGAGGCAGTTCGG     |
| <i>GmSGF14j</i> | TCAACCTCCTCGACTCCAAC   | AAGTTGAGAGCGAGACCCAA     |
| <i>GmSGF14k</i> | GCGACGGAATCCTCAAATC    | ACACGGAGAAGTTCAGAGCA     |
| <i>GmSGF14l</i> | GCTGAACGTGGAATTGACGG   | ACCAGCAGAGCTAGAGGGAA     |
| <i>GmSGF14m</i> | CTCATTCCTTCCGCTGCATC   | TTGAGAGCAAGTCCCAACCT     |
| <i>GmSGF14n</i> | CGGAGAGCTTCATGGAGGAT   | CCAGCCTTGAATTCTGCCAA     |
| <i>GmSGF14o</i> | CTTCGTCTACATCGCCAAGC   | CTGCCTGTACTCCTTAATCCG    |
| <i>GmSGF14p</i> | TCGGAGCTGGATACCCTGAA   | TCTCCTTGATCAACCCTGGC     |
| <i>GmSGF14q</i> | CTTGGCGCATCATGTCATCA   | TCCTGGTCGGTCTTGAACTC     |
| <i>GmSGF14r</i> | GGACTTGCGCTCAACTTCTC   | GCAGGTTTGGCTTCTTCTGT     |
| <i>GmSGF14s</i> | CCGTCGCCTACAAGAACATG   | GGCTCCCTTCATCTTGAGGT     |
| <i>GmSGF14t</i> | TGTTGAAATGTTCTGCTTGCA  | AGGTAAATCAACCTCTGCTGCAGT |
| <i>GmActin</i>  | CGGTGGTTCTATCTTGGCATC  | GTCTTTCGCTTCAATAACCCTA   |

\* *GmActin*: *Glyma18g52780*, was used as the internal reference.
